# Supplementary material for: Multiple-allergen oral immunotherapy improves quality of life in caregivers of food-allergic pediatric subjects
Source: Springer Nature journal article supplement (doi:10.1186/1710-1492-10-25), 2014-05-12

**A**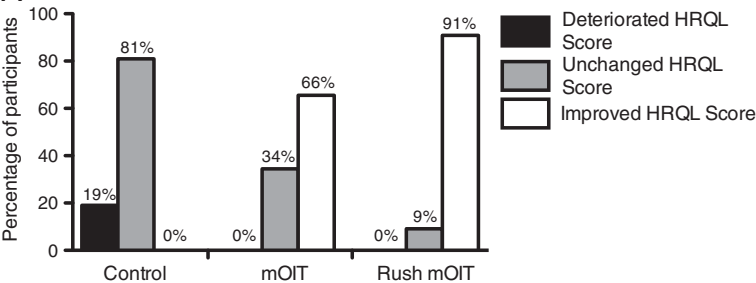**B**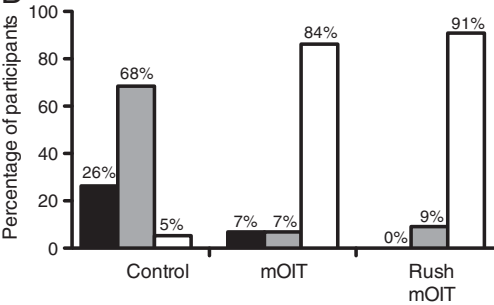

Supplement: 13223_2014_498_MOESM3_ESM.pdf [file 13223_2014_498_MOESM3_ESM.pdf]
